# Supplementary material
Source: PubMed Central journal article supplement (PMC9253203)
Supplement: NIHMS1785036-supplement-SOM.pdf [file NIHMS1785036-supplement-SOM.pdf]

## SUPPLEMENTAL ONLINE MATERIAL

### Increased heroin intake and relapse vulnerability in intermittent relative to continuous self-administration: sex differences in rats

Ginevra D'Ottavio, Ingrid Reverte, Davide Ragozzino, Maria Meringolo, Michele Stanislaw Milella, Fernando Boix, Marco Venniro, Aldo Badiani, Daniele Caprioli

Modeling brain levels of heroin and its metabolites. The following differential equations were used by Kinetica v.5.1 (Thermo Fisher Scientific Inc) to calculate the parameters to fit the ECF brain concentrations of heroin, 6-monoacetylmorphine, and morphine:

- One compartment:

$$Co = A \frac{Ka}{Ka - \alpha} (e^{-\alpha tl} - e^{-ka tl})$$

- Two compartments:

$$Co = A \frac{Ka}{Ka - \alpha} (e^{-\alpha tl} - e^{-ka tl}) + B \frac{Ka/\beta}{Ka - \beta} (e^{(-\beta tl)} - e^{(-ka tl)})$$

- Three compartments:

$$Co = A \frac{Ka}{Ka - \alpha} (e^{-\alpha tl} - e^{-ka tl}) + B \frac{Ka}{Ka - \beta} (e^{(-\beta tl)} - e^{(-ka tl)}) + C \frac{Ka}{Ka - \gamma} (e^{(-\gamma tl)} - e^{(-ka tl)})$$

Co is the concentration at time t; A, B and C are coefficients which describe the exponential functions, whereas  $\alpha$ ,  $\beta$  and  $\gamma$  are exponents which describe the shape of the measured concentration curve for each phase; Ka is the absorption rate; and  $tl=t$ -lag at time t.

From these "macro" constants, the PK parameters (**Supplementary Table 1**) are calculated as follows:

- One compartment:

$$Kel = \alpha$$

- Two compartments:

$$Co = A + B$$

$$K_{21} = \frac{A * \beta + B * \alpha}{Co}$$

$$K_{12} = \alpha + \beta - (K_{21} + Kel)$$

$$Kel = \frac{\alpha * \beta}{K_{21}}$$

- Three compartments:

$$Co = A + B + C$$

$$a = \alpha + \beta + \gamma$$

$$b = \frac{C * \alpha + B * \alpha + A * \gamma + B * \gamma + A * \beta + C * \beta}{-Co}$$

$$c = \frac{C * \alpha * \beta + B * \alpha * \gamma + A * \beta * \gamma}{Co}$$

$$K_{31} = \frac{-b - \sqrt{(b^2 - 4c)}}{2}$$

$$K_{21} = -b - K_{31}$$

$$Kel = \frac{\alpha * \beta * \gamma}{K_{21} - K_{31}}$$

$$K_{12} = \frac{(\beta * \gamma + \alpha * \beta + \alpha * \gamma - K_{21} * a - Kel * K_{31} + K_{21}^2)}{(K_{31} - K_{21})}$$

$$K_{13} = a - (Kel + K_{12} + K_{21} + K_{31})$$

These same equations are used during simulation to calculate the theoretical concentrations when the parameters are known. For administration of multiple doses, the software uses the superposition principle by independently computing the concentrations for each dose administered and afterwards adding the calculated concentrations for each time point of the session.

**Supplementary Table 1.** Pharmacokinetic parameters used in Gottås et al (Gottas et al., 2013) to fit the concentrations of heroin, 6-monoacetylmorphine (6-MAM), and morphine in the brain extracellular fluid after intravenous administration of 3 µmol (1.3 mg) heroin in the rat (Boix, Andersen & Morland, 2013). These same parameters were applied to the FitMultiMicroExtravascular model of the software program Kinetica v.5.1 (Thermo Fisher Scientific Inc., Waltham, MA, USA) to simulate the brain concentrations taking into account the times of the single infusions during the 10<sup>th</sup> self-administration training session.

| Parameter             | Ka                | lag      | Volume   | Kel               | K12               | K21               | K13               | K31               |
|-----------------------|-------------------|----------|----------|-------------------|-------------------|-------------------|-------------------|-------------------|
| Unit                  | min <sup>-1</sup> | min      | L        | min <sup>-1</sup> |
| Heroin <sup>1</sup>   | 0.749072          | 0.757626 | 0.401859 | 2.18171           |                   |                   |                   |                   |
| 6-MAM <sup>2</sup>    | 1.00001           | 1.52153  | 0.417121 | 0.0695501         | 0.00802414        | 0.032289          |                   |                   |
| Morphine <sup>3</sup> | 0.050732          | 1.22008  | 0.873335 | 0.0418547         | 0.114092          | 0.115256          | 0.0182552         | 0.012605          |

<sup>1</sup> One compartment extravascular model

<sup>2</sup> Two compartments extravascular model

<sup>3</sup> Three compartments extravascular model

*Ka*: Absorption rate constant from injection site. *Lag*: Time taken to appear in the brain following administration. *Kel*: Elimination rate constant from brain. *Volume*: Volume of distribution. *KXY*: Transfer rate constant between compartment X and Y (1 = measured compartment)

**Supplementary Table 2.** Statistical analysis (SPSS GLM repeated-measures module). Partial Eta<sup>2</sup> = proportion of explained variance.

| Figure number                                                    | Factor name                        | F-value                     | p-value         | Partial Eta <sup>2</sup> |
|------------------------------------------------------------------|------------------------------------|-----------------------------|-----------------|--------------------------|
| Figure S2A<br>SM7% intake<br>(acquisition phase)                 | Session (within)                   | F <sub>2,240</sub> =52.272  | <b>p=0.001*</b> | 0.300                    |
|                                                                  | Sex (between)                      | F <sub>1,120</sub> =54.315  | <b>p=0.001*</b> | 0.308                    |
|                                                                  | Session X Sex interaction          | F <sub>2,240</sub> =7.782   | <b>p=0.001*</b> | 0.060                    |
| Figure S2A<br>SM7% intake<br>(training phase)                    | Session (within)                   | F <sub>4,480</sub> =0.623   | p=0.646         | 0.005                    |
|                                                                  | Sex (between)                      | F <sub>1,120</sub> =91.739  | <b>p=0.001*</b> | 0.429                    |
|                                                                  | Session X Sex interaction          | F <sub>4,480</sub> =1.039   | p=0.375         | 0.008                    |
| Figure S2B<br>SM7% lever pressing<br>(acquisition)               | Session (within)                   | F <sub>2,120</sub> =8.477   | <b>p=0.001*</b> | 0.065                    |
|                                                                  | Sex (between)                      | F <sub>1,120</sub> =20.317  | <b>p=0.001*</b> | 0.143                    |
|                                                                  | Session X Sex interaction          | F <sub>2,120</sub> =5.873   | <b>p=0.004*</b> | 0.046                    |
| Figure S2B<br>SM7% lever pressing<br>(training phase)            | Session (within)                   | F <sub>4,120</sub> =6.975   | <b>p=0.001*</b> | 0.054                    |
|                                                                  | Sex (between)                      | F <sub>1,120</sub> =2.768   | p=0.099         | 0.022                    |
|                                                                  | Session X Sex interaction          | F <sub>4,120</sub> =2.725   | <b>p=0.049*</b> | 0.022                    |
| Figure 2A<br>Heroin intake<br>(acquisition phase)                | Session (within)                   | F <sub>2,236</sub> =0.739   | p=0.479         | 0.006                    |
|                                                                  | Sex (between)                      | F <sub>2,118</sub> =0.000   | p=0.996         | 0.000                    |
|                                                                  | Access (between)                   | F <sub>2,118</sub> =1.017   | p=0.315         | 0.008                    |
|                                                                  | Session X Sex interaction          | F <sub>2,236</sub> =0.904   | p=0.406         | 0.007                    |
|                                                                  | Session X Access interaction       | F <sub>2,236</sub> =1.724   | p=0.181         | 0.014                    |
|                                                                  | Session X Sex X Access interaction | F <sub>2,236</sub> =0.410   | p=0.664         | 0.003                    |
| Total heroin intake<br>(acquisition phase)                       | Access (between)                   | F <sub>3,120</sub> =1.017   | p=0.315         | 0.008                    |
|                                                                  | Sex (between)                      | F <sub>3,120</sub> =0.000   | p=0.996         | 0.000                    |
|                                                                  | Access X Sex                       | F <sub>3,120</sub> =0.030   | p=0.862         | 0.000                    |
| Figure 2A<br>Heroin intake<br>(training phase)                   | Session (within)                   | F <sub>9,1080</sub> =36.061 | <b>p=0.001*</b> | 0.231                    |
|                                                                  | Sex (between)                      | F <sub>9,120</sub> =0.359   | p=0.550         | 0.003                    |
|                                                                  | Access (between)                   | F <sub>9,120</sub> =3.960   | <b>p=0.049*</b> | 0.032                    |
|                                                                  | Session X Sex interaction          | F <sub>9,1080</sub> =1.462  | p=0.229         | 0.012                    |
|                                                                  | Session X Access interaction       | F <sub>9,1080</sub> =1.273  | p=0.262         | 0.010                    |
|                                                                  | Session X Sex X Access interaction | F <sub>9,1080</sub> =3.673  | p=0.058         | 0.030                    |
| Figure 2B<br>Heroin frequency of intake<br>(acquisition phase)   | Session (within)                   | F <sub>2,240</sub> =0.739   | p=0.436         | 0.006                    |
|                                                                  | Sex (between)                      | F <sub>1,120</sub> =0.000   | p=0.996         | 0.0001                   |
|                                                                  | Access (between)                   | F <sub>1,120</sub> =1.017   | p=0.315         | 0.008                    |
|                                                                  | Session X Sex interaction          | F <sub>2,240</sub> =0.904   | p=0.344         | 0.007                    |
|                                                                  | Session X Access interaction       | F <sub>2,240</sub> =1.724   | p=0.181         | 0.014                    |
|                                                                  | Session X Sex X Access interaction | F <sub>2,240</sub> =0.410   | p=0.594         | 0.003                    |
| Figure 2B<br>Heroin frequency of intake<br>(training phase)      | Session (within)                   | F <sub>9,1080</sub> =30.322 | <b>p=0.001*</b> | 0.202                    |
|                                                                  | Sex (between)                      | F <sub>1,120</sub> =0.113   | p=0.737         | 0.001                    |
|                                                                  | Access (between)                   | F <sub>1,120</sub> =156.573 | <b>p=0.001*</b> | 0.566                    |
|                                                                  | Session X Sex interaction          | F <sub>9,1080</sub> =1.108  | p=0.350         | 0.009                    |
|                                                                  | Session X Access interaction       | F <sub>9,1080</sub> =17.035 | <b>p=0.001*</b> | 0.124                    |
|                                                                  | Session X Sex X Access interaction | F <sub>9,1080</sub> =2.018  | p=0.099         | 0.017                    |
| Figure 2C<br>Heroin active lever pressing<br>(acquisition phase) | Session (within)                   | F <sub>2,236</sub> =0.851   | p=0.375         | 0.017                    |
|                                                                  | Sex (between)                      | F <sub>1,118</sub> =0.992   | p=0.372         | 0.008                    |
|                                                                  | Access (between)                   | F <sub>1,118</sub> =3.257   | p=0.074         | 0.026                    |

|                                                                 |                                                                                                 |                                                                |                                                                             |                          |
|-----------------------------------------------------------------|-------------------------------------------------------------------------------------------------|----------------------------------------------------------------|-----------------------------------------------------------------------------|--------------------------|
|                                                                 | Session X Sex interaction<br>Session X Access interaction<br>Session X Sex X Access interaction | $F_{2,236}=0.439$<br>$F_{2,236}=4.262$<br>$F_{2,236}=0.889$    | $p=0.645$<br><b><math>p=0.041^*</math></b><br>$p=0.412$                     | 0.004<br>0.034<br>0.007  |
| Figure 2C<br>Heroin active lever pressing<br>(training phase)   | Session (within)<br>Sex (between)<br>Access (between)                                           | $F_{9,1035}=24.656$<br>$F_{1,115}=0.013$<br>$F_{1,115}=0.490$  | <b><math>p=0.001^*</math></b><br>$p=0.911$<br>$p=0.485$                     | 0.174<br>0.000<br>0.004  |
|                                                                 | Session X Sex interaction<br>Session X Access interaction<br>Session X Sex X Access interaction | $F_{9,1035}=2.453$<br>$F_{9,1035}=0.675$<br>$F_{9,1035}=2.705$ | <b><math>p=0.008^*</math></b><br>$p=0.594$<br><b><math>p=0.030^*</math></b> | 0.021<br>0.006<br>0.023  |
| Heroin inactive lever pressing<br>(acquisition phase)           | Session (within)<br>Sex (between)<br>Access (between)                                           | $F_{2,236}=0.372$<br>$F_{1,118}=1.532$<br>$F_{1,118}=0.118$    | $p=0.689$<br>$p=0.218$<br>$p=0.732$                                         | 0.003<br>0.013<br>0.001  |
|                                                                 | Session X Sex interaction<br>Session X Access interaction<br>Session X Sex X Access interaction | $F_{2,236}=0.048$<br>$F_{2,236}=0.490$<br>$F_{2,236}=0.161$    | $p=0.954$<br>$p=0.613$<br>$p=0.852$                                         | 0.0001<br>0.004<br>0.001 |
| Heroin inactive lever pressing<br>(training phase)              | Session (within)<br>Sex (between)<br>Access (between)                                           | $F_{9,1062}=4.971$<br>$F_{1,118}=0.679$<br>$F_{1,118}=0.535$   | <b><math>p=0.001^*</math></b><br>$p=0.412$<br>$p=0.466$                     | 0.004<br>0.006<br>0.005  |
|                                                                 | Session X Sex interaction<br>Session X Access interaction<br>Session X Sex X Access interaction | $F_{9,1062}=0.692$<br>$F_{9,1062}=0.950$<br>$F_{9,1062}=0.498$ | $p=0.717$<br>$p=0.480$<br>$p=0.877$                                         | 0.006<br>0.008<br>0.004  |
| Inter-infusion intervals<br>(continuous access)                 | Sex                                                                                             | $F_{1,58}=0.439$                                               | $p=0.510$                                                                   | 0.008                    |
| Figure 3A<br>Cumulative infusions (10 <sup>th</sup><br>session) | Continuous access<br>Sex (between)<br>Intermittent access<br>Sex (between)                      | $F_{1,63}=1.875$<br><br>$F_{1,60}=1.736$                       | $p=0.085$<br><br>$p=0.067$                                                  | 1.000<br><br>0.619       |
| Figure 3B<br>1 <sup>st</sup> minute                             | Session (within)<br>Sex (between)                                                               | $F_{9,59}=13.256$<br>$F_{1,59}=0.194$                          | <b><math>p=0.001^*</math></b><br>$p=0.661$                                  | 0.183<br>0.003           |
|                                                                 | Session X Sex interaction                                                                       | $F_{9,59}=1.571$                                               | $p=0.215$                                                                   | 0.026                    |
| Figure 3B<br>2 <sup>nd</sup> minute                             | Session (within)<br>Sex (between)                                                               | $F_{9,59}=1.062$<br>$F_{1,59}=0.007$                           | $p=0.307$<br>$p=0.936$                                                      | 0.018<br>0.000           |
|                                                                 | Session X Sex interaction                                                                       | $F_{9,59}=1.141$                                               | $p=0.290$                                                                   | 0.019                    |
| Figure 3B<br>3 <sup>rd</sup> minute                             | Session (within)<br>Sex (between)                                                               | $F_{9,59}=1.151$<br>$F_{1,59}=0.014$                           | $p=0.223$<br>$p=0.905$                                                      | 0.025<br>0.000           |
|                                                                 | Session X Sex interaction                                                                       | $F_{9,59}=0.349$                                               | $p=0.557$                                                                   | 0.006                    |
| Figure 3B<br>4 <sup>th</sup> minute                             | Session (within)<br>Sex (between)                                                               | $F_{9,59}=2.347$<br>$F_{1,59}=0.607$                           | $p=0.131$<br>$p=0.439$                                                      | 0.038<br>0.010           |
|                                                                 | Session X Sex interaction                                                                       | $F_{9,59}=0.437$                                               | $p=0.511$                                                                   | 0.007                    |
| Figure 3B<br>5 <sup>th</sup> minute                             | Session (within)<br>Sex (between)                                                               | $F_{9,59}=1.005$<br>$F_{1,59}=0.643$                           | $p=0.410$<br>$p=0.426$                                                      | 0.017<br>0.011           |
|                                                                 | Session X Sex interaction                                                                       | $F_{9,59}=0.698$                                               | $p=0.711$                                                                   | 0.012                    |
| Discrete-choice tests<br>Preference score                       | Session (within)<br>Sex (between)<br>Access (Between)                                           | $F_{1,55}=0.066$<br>$F_{1,55}=2.488$<br>$F_{1,55}=0.822$       | $p=0.798$<br>$p=0.120$<br>$p=0.386$                                         | 0.0001<br>0.043<br>0.015 |
|                                                                 | Session X Sex interaction<br>Session X Access interaction                                       | $F_{1,55}=0.013$<br>$F_{1,55}=2.452$                           | $p=0.191$<br>$p=0.123$                                                      | 0.003<br>0.043           |

|                                                                         |                                                                  |                    |                               |           |
|-------------------------------------------------------------------------|------------------------------------------------------------------|--------------------|-------------------------------|-----------|
|                                                                         | Session X Sex X Access interaction                               | $F_{1,55}=0.031$   | $p=0.860$                     | 0.0001    |
| Figure 5<br>Voluntary abstinence<br>Preference score                    | Session (within)                                                 | $F_{17,765}=4.010$ | <b><math>p=0.001^*</math></b> | 0.082     |
|                                                                         | Sex (between)                                                    | $F_{1,45}=0.156$   | $p=0.695$                     | 0.003     |
|                                                                         | Access (between)                                                 | $F_{1,45}=3.630$   | $p=0.054$                     | 0.032     |
|                                                                         | Session X Sex interaction                                        | $F_{17,765}=0.949$ | $p=0.515$                     | 0.021     |
|                                                                         | Session X Access interaction                                     | $F_{17,765}=0.502$ | $p=0.953$                     | 0.011     |
|                                                                         | Session X Sex X Access interaction                               | $F_{17,765}=0.686$ | $p=0.818$                     | 0.015     |
| Figure 6A (left)<br>Relapse (incubation) test                           | Abstinence day (within)                                          | $F_{1,94}=14.699$  | <b><math>p=0.001^*</math></b> | 0.135     |
|                                                                         | Access (between)                                                 | $F_{1,94}=5.895$   | <b><math>p=0.017^*</math></b> | 0.059     |
|                                                                         | Sex (between)                                                    | $F_{1,94}=3.105$   | $p=0.081$                     | 0.032     |
|                                                                         | Abstinence condition (between)                                   | $F_{1,94}=2.841$   | $p=0.095$                     | 0.029     |
|                                                                         | Abstinence day X Sex interaction                                 | $F_{1,94}=0.003$   | $p=0.991$                     | 0.0001    |
|                                                                         | Abstinence day X Access interaction                              | $F_{1,94}=7.239$   | <b><math>p=0.009^*</math></b> | 0.072     |
|                                                                         | Abstinence day X Abstinence condition interaction                | $F_{1,94}=8.826$   | <b><math>p=0.004^*</math></b> | 0.086     |
|                                                                         | Abstinence day X Sex X Access interaction                        | $F_{1,94}=0.544$   | $p=0.462$                     | 0.006     |
|                                                                         | Abstinence day X Sex X Abstinence condition interaction          | $F_{1,94}=0.126$   | $p=0.606$                     | 0.003     |
|                                                                         | Abstinence day X Access X Abstinence condition interaction       | $F_{1,94}=0.232$   | $p=0.631$                     | 0.002     |
|                                                                         | Abstinence day X Sex X Access X Abstinence condition interaction | $F_{1,94}=0.136$   | $p=0.714$                     | 0.001     |
|                                                                         | Figure 6A (left)<br>Relapse (incubation) test<br>(Day 1)         | Sex (between)      | $F_{1,94}=2.325$              | $p=0.131$ |
| Access (between)                                                        |                                                                  | $F_{1,94}=12.056$  | <b><math>p=0.001^*</math></b> | 0.114     |
| Abstinence condition (between)                                          |                                                                  | $F_{1,94}=0.006$   | $p=0.941$                     | 0.000     |
| Figure 6A (center)<br>Relapse (incubation) test<br>(continuous access)  | Abstinence day (within)                                          | $F_{1,44}=24.872$  | <b><math>p=0.001^*</math></b> | 0.361     |
|                                                                         | Sex (between)                                                    | $F_{1,44}=0.149$   | $p=0.702$                     | 0.003     |
|                                                                         | Abstinence condition (between)                                   | $F_{1,44}=1.829$   | $p=0.183$                     | 0.040     |
|                                                                         | Abstinence day X Sex interaction                                 | $F_{1,44}=0.329$   | $p=0.569$                     | 0.007     |
|                                                                         | Abstinence day X Abstinence condition interaction                | $F_{1,44}=6.985$   | <b><math>p=0.011^*</math></b> | 0.137     |
|                                                                         | Abstinence day X Sex X Abstinence condition interaction          | $F_{1,44}=0.0001$  | $p=0.992$                     | 0.0001    |
| Figure 6A (right)<br>Relapse (incubation) test<br>(intermittent access) | Abstinence day (within)                                          | $F_{1,50}=0.586$   | $p=0.447$                     | 0.012     |
|                                                                         | Sex (between)                                                    | $F_{1,50}=4.245$   | <b><math>p=0.046^*</math></b> | 0.078     |
|                                                                         | Abstinence condition (between)                                   | $F_{1,50}=1.138$   | $p=0.291$                     | 0.022     |
|                                                                         | Abstinence day X Sex interaction                                 | $F_{1,50}=0.240$   | $p=0.626$                     | 0.005     |
|                                                                         | Abstinence day X Abstinence condition interaction                | $F_{1,50}=2.826$   | $p=0.099$                     | 0.054     |
|                                                                         | Abstinence day X Sex X Abstinence condition interaction          | $F_{1,50}=0.238$   | $p=0.628$                     | 0.005     |

|                                                                                |                                                    |                   |                 |        |
|--------------------------------------------------------------------------------|----------------------------------------------------|-------------------|-----------------|--------|
| Figure 6B<br>Time course relapse test<br>(Day 1)                               | Minute (within)                                    | $F_{2,94}=74.953$ | <b>p=0.001*</b> | 0.444  |
|                                                                                | Sex (between)                                      | $F_{2,94}=2.209$  | p=0.141         | 0.023  |
|                                                                                | Access (between)                                   | $F_{2,94}=12.416$ | <b>p=0.001*</b> | 0.117  |
|                                                                                | Abstinence condition<br>(between)                  | $F_{2,94}=0.001$  | p=0.082         | 0.026  |
|                                                                                | Sex X Access interaction                           | $F_{2,94}=2.535$  | p=0.082         | 0.026  |
| Figure 6C<br>Time course relapse test<br>(Day 21)                              | Sex X Abstinence condition<br>interaction          | $F_{2,94}=0.131$  | p=0.854         | 0.001  |
|                                                                                | Access X Abstinence condition<br>interaction       | $F_{2,94}=1.779$  | p=0.176         | 0.019  |
|                                                                                | Sex X Access X Abstinence<br>condition interaction | $F_{2,94}=0.918$  | p=0.401         | 0.010  |
|                                                                                | Minute (within)                                    | $F_{2,94}=34.607$ | <b>p=0.001*</b> | 0.269  |
|                                                                                | Sex (between)                                      | $F_{2,94}=1.719$  | p=0.193         | 0.018  |
| Figure S3<br>Heroin intake:<br>estrous cycle<br>(5 days)                       | Access (between)                                   | $F_{2,94}=0.550$  | p=0.550         | 0.460  |
|                                                                                | Abstinence condition<br>(between)                  | $F_{2,94}=7.167$  | <b>p=0.009*</b> | 0.071  |
|                                                                                | Sex X Access interaction                           | $F_{2,94}=0.383$  | p=0.682         | 0.004  |
|                                                                                | Sex X Abstinence condition<br>interaction          | $F_{2,94}=2.809$  | p=0.063         | 0.029  |
|                                                                                | Access X Abstinence condition<br>interaction       | $F_{2,94}=0.988$  | p=0.374         | 0.010  |
| Figure 7A<br>Relapse (incubation) test:<br>estrous cycle<br>(Abstinence day 1) | Sex X Access X Abstinence<br>condition interaction | $F_{2,94}=0.933$  | p=0.395         | 0.010  |
|                                                                                | Continuous access                                  | t=0.0187          | p=0.985         | df=44  |
|                                                                                | Intermittent access                                | t=0.1857          | p=0.853         | df=44  |
| Figure 7A<br>Relapse (incubation) test:<br>estrous cycle<br>(Abstinence day 1) | Access (between)                                   | $F_{1,44}=5.874$  | <b>p=0.013*</b> | 0.118  |
|                                                                                | Cycle (between)                                    | $F_{1,44}=0.043$  | p=0.837         | 0.001  |
|                                                                                | Access X Cycle interaction                         | $F_{1,44}=0.015$  | p=0.903         | 0.0001 |

**Figure S1**

**Apparatus**

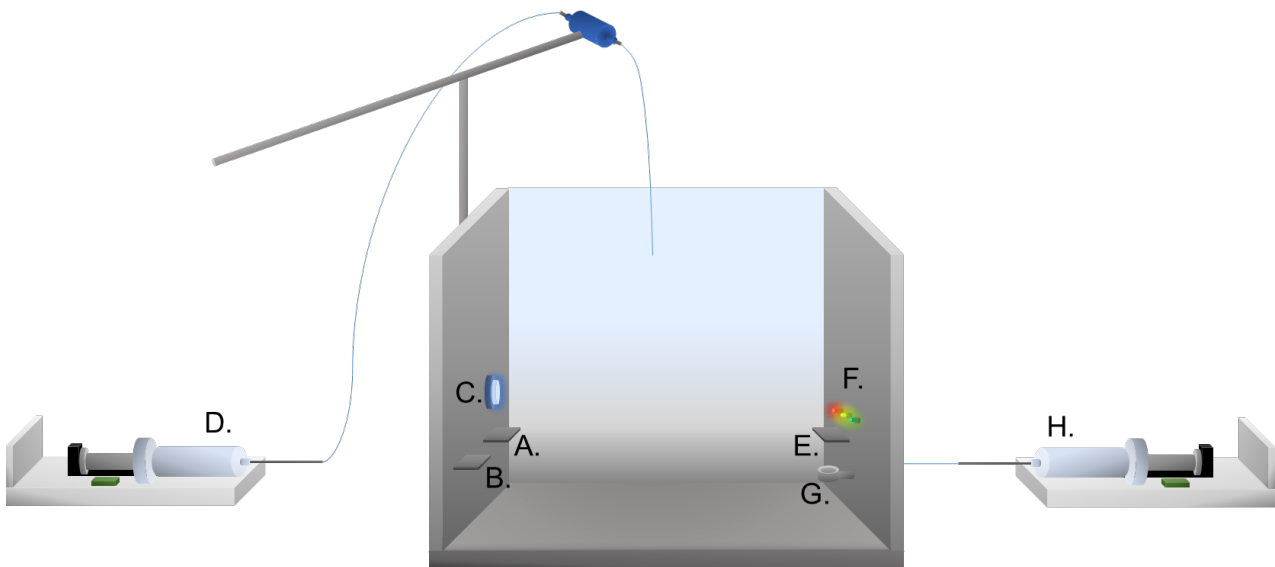

**Figure S1. Apparatus.** (A) Active heroin lever. (B) Inactive heroin lever. (C) White-light cue. (D) Heroin pump. (E) Sucrose+Maltodextrine 7% lever. (F) Three-light cue. (G) Receptacle. (H) Sucrose+Maltodextrine 7% pump.



Figure S2

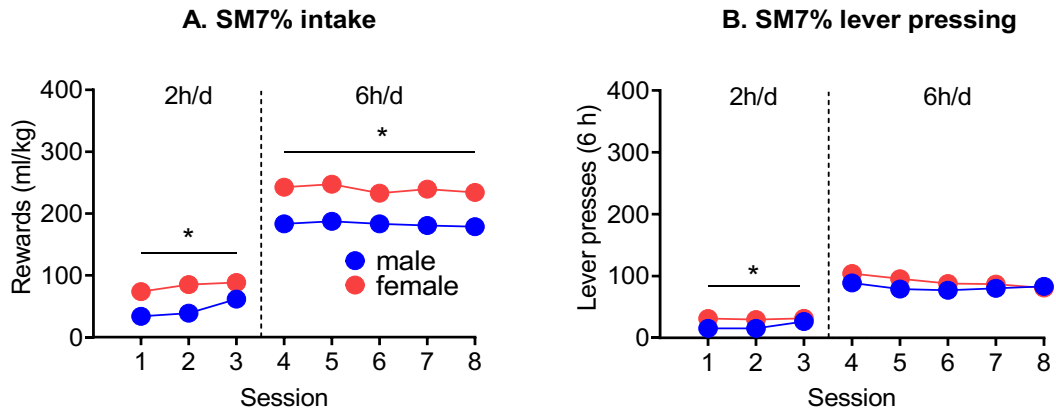

**Figure S2.** Sucrose + Maltodextrin 7% self-administration training (SM7%). **(A)** SM7% intake.

Mean±SEM number of SM7% rewards earned (1 ml infusion) during sessions. **(B)** SM7% lever pressing. Mean±SEM number of lever presses during sessions. \*Different from males,  $p < 0.05$  (males  $n = 53$  / females  $n = 71$ ).

**Figure S3**

**Heroin intake: estrous cycle**

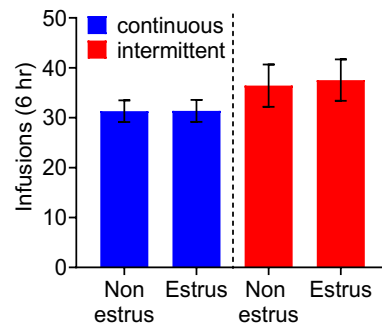

**Figure S3.** *Effect of estrous cycle on continuous or intermittent heroin self-administration in female rats. Heroin intake: estrous cycle. Mean±SEM of the average of infusions earned during non-estrus and estrus phase in the last five days of heroin self-administration (n=48).*

## References

Boix F, Andersen JM, & Morland J (2013). Pharmacokinetic modeling of subcutaneous heroin and its metabolites in blood and brain of mice. *Addict Biol* 18: 1-7.

Gottas A, Oiestad EL, Boix F, Vindenes V, Ripel A, Thaulow CH, *et al.* (2013). Levels of heroin and its metabolites in blood and brain extracellular fluid after i.v. heroin administration to freely moving rats. *Br J Pharmacol* 170: 546-556.
